# Supplementary material for: Holistic quality evaluation of compound liquorice tablets using capillary electrophoresis fingerprinting combined with chemometric methods
Source: Royal Society of Chemistry journal article supplement (doi:10.1039/d0nj05461e), 2020-12-30
Supplement: d0nj05461e1.pdf [file d0nj05461e1.pdf]

## Supporting Information

### Holistic quality evaluation of Compound Licorice Tablets using Capillary electrophoresis fingerprint combined with chemometric methods

Dandan Gong<sup>a</sup>, Zijia Zheng<sup>a</sup>, Jinyu Chen<sup>a</sup>, Ying Pang<sup>a</sup>, Guoxiang Sun<sup>a\*</sup>

**Table S1** Similarity analysis of 36 batches of CLQTs using similarity evaluation system (China Committee of Pharmacopeia, 2012) for chromatographic fingerprint analysis of TCMs

|     | S1    | S2    | S3    | S4    | S5    | S6    | S7    | S8    | S9    | S10   | S11   | S12   | S13   | S14   | S15   | S16   | S17   | S18   | S19   | S20   | S21   | S22   | S23   | S24   | S25   | S26   | S27   | S28   | S29   | S30   | S31   | S32   | S33   | S34   | S35   | S36   | RFP   |
|-----|-------|-------|-------|-------|-------|-------|-------|-------|-------|-------|-------|-------|-------|-------|-------|-------|-------|-------|-------|-------|-------|-------|-------|-------|-------|-------|-------|-------|-------|-------|-------|-------|-------|-------|-------|-------|-------|
| S1  | 1.000 | 0.995 | 0.989 | 0.974 | 0.966 | 0.986 | 0.944 | 0.954 | 0.979 | 0.944 | 0.886 | 0.930 | 0.961 | 0.976 | 0.960 | 0.989 | 0.974 | 0.990 | 0.930 | 0.944 | 0.966 | 0.954 | 0.979 | 0.886 | 0.961 | 0.976 | 0.960 | 0.976 | 0.974 | 0.990 | 0.944 | 0.966 | 0.954 | 0.986 | 0.971 | 0.960 | 0.981 |
| S2  | 0.995 | 1.000 | 0.985 | 0.980 | 0.971 | 0.979 | 0.955 | 0.896 | 0.975 | 0.955 | 0.879 | 0.950 | 0.960 | 0.974 | 0.963 | 0.985 | 0.980 | 0.989 | 0.950 | 0.955 | 0.971 | 0.896 | 0.975 | 0.879 | 0.960 | 0.974 | 0.963 | 0.974 | 0.980 | 0.989 | 0.955 | 0.971 | 0.896 | 0.979 | 0.974 | 0.963 | 0.987 |
| S3  | 0.989 | 0.985 | 1.000 | 0.979 | 0.971 | 0.985 | 0.941 | 0.962 | 0.972 | 0.941 | 0.899 | 0.927 | 0.965 | 0.974 | 0.966 | 1.000 | 0.979 | 0.994 | 0.927 | 0.941 | 0.961 | 0.862 | 0.972 | 0.899 | 0.965 | 0.974 | 0.966 | 0.974 | 0.979 | 0.994 | 0.941 | 0.961 | 0.862 | 0.985 | 0.981 | 0.966 | 0.984 |
| S4  | 0.974 | 0.980 | 0.979 | 1.000 | 0.939 | 0.967 | 0.908 | 0.920 | 0.935 | 0.908 | 0.845 | 0.924 | 0.931 | 0.968 | 0.947 | 0.979 | 1.000 | 0.984 | 0.924 | 0.908 | 0.929 | 0.920 | 0.935 | 0.845 | 0.931 | 0.968 | 0.947 | 0.968 | 1.000 | 0.984 | 0.908 | 0.929 | 0.920 | 0.967 | 0.951 | 0.947 | 0.969 |
| S5  | 0.966 | 0.971 | 0.971 | 0.939 | 1.000 | 0.971 | 0.974 | 0.905 | 0.992 | 0.974 | 0.892 | 0.953 | 0.984 | 0.961 | 0.977 | 0.971 | 0.939 | 0.964 | 0.953 | 0.974 | 0.983 | 0.905 | 0.992 | 0.892 | 0.984 | 0.961 | 0.977 | 0.961 | 0.939 | 0.964 | 0.974 | 0.983 | 0.905 | 0.971 | 0.985 | 0.977 | 0.986 |
| S6  | 0.986 | 0.979 | 0.985 | 0.967 | 0.971 | 1.000 | 0.925 | 0.957 | 0.975 | 0.925 | 0.891 | 0.907 | 0.957 | 0.974 | 0.954 | 0.985 | 0.967 | 0.988 | 0.907 | 0.925 | 0.954 | 0.957 | 0.975 | 0.891 | 0.957 | 0.974 | 0.954 | 0.974 | 0.967 | 0.988 | 0.925 | 0.954 | 0.957 | 1.000 | 0.956 | 0.954 | 0.976 |
| S7  | 0.944 | 0.955 | 0.941 | 0.908 | 0.974 | 0.925 | 1.000 | 0.930 | 0.978 | 1.000 | 0.860 | 0.985 | 0.955 | 0.929 | 0.954 | 0.941 | 0.908 | 0.928 | 0.985 | 1.000 | 0.995 | 0.930 | 0.978 | 0.860 | 0.955 | 0.929 | 0.954 | 0.929 | 0.908 | 0.928 | 1.000 | 0.995 | 0.930 | 0.925 | 0.967 | 0.954 | 0.972 |
| S8  | 0.954 | 0.896 | 0.962 | 0.920 | 0.505 | 0.957 | 0.930 | 1.000 | 0.984 | 0.930 | 0.947 | 0.903 | 0.927 | 0.893 | 0.874 | 0.862 | 0.920 | 0.942 | 0.903 | 0.930 | 0.927 | 1.000 | 0.884 | 0.947 | 0.927 | 0.893 | 0.874 | 0.893 | 0.920 | 0.942 | 0.930 | 0.927 | 1.000 | 0.957 | 0.886 | 0.874 | 0.877 |
| S9  | 0.979 | 0.975 | 0.972 | 0.935 | 0.992 | 0.975 | 0.978 | 0.884 | 1.000 | 0.978 | 0.891 | 0.951 | 0.980 | 0.966 | 0.973 | 0.972 | 0.935 | 0.965 | 0.951 | 0.978 | 0.991 | 0.884 | 1.000 | 0.891 | 0.980 | 0.966 | 0.973 | 0.966 | 0.935 | 0.965 | 0.978 | 0.991 | 0.884 | 0.975 | 0.977 | 0.973 | 0.986 |
| S10 | 0.944 | 0.955 | 0.941 | 0.908 | 0.974 | 0.925 | 1.000 | 0.930 | 0.978 | 1.000 | 0.860 | 0.985 | 0.955 | 0.929 | 0.954 | 0.941 | 0.908 | 0.928 | 0.985 | 1.000 | 0.995 | 0.930 | 0.978 | 0.860 | 0.955 | 0.929 | 0.954 | 0.929 | 0.908 | 0.928 | 1.000 | 0.995 | 0.930 | 0.925 | 0.967 | 0.954 | 0.972 |
| S11 | 0.886 | 0.879 | 0.899 | 0.845 | 0.892 | 0.891 | 0.860 | 0.947 | 0.891 | 0.860 | 1.000 | 0.809 | 0.866 | 0.841 | 0.841 | 0.899 | 0.845 | 0.903 | 0.909 | 0.860 | 0.870 | 0.947 | 0.891 | 1.000 | 0.866 | 0.841 | 0.841 | 0.841 | 0.845 | 0.903 | 0.860 | 0.870 | 0.947 | 0.891 | 0.888 | 0.841 | 0.885 |
| S12 | 0.930 | 0.950 | 0.927 | 0.924 | 0.953 | 0.907 | 0.985 | 0.903 | 0.951 | 0.985 | 0.909 | 1.000 | 0.934 | 0.927 | 0.946 | 0.927 | 0.924 | 0.916 | 1.000 | 0.985 | 0.979 | 0.903 | 0.951 | 0.909 | 0.934 | 0.927 | 0.946 | 0.927 | 0.924 | 0.916 | 0.985 | 0.979 | 0.903 | 0.907 | 0.951 | 0.946 | 0.966 |
| S13 | 0.961 | 0.960 | 0.965 | 0.931 | 0.984 | 0.957 | 0.955 | 0.927 | 0.980 | 0.955 | 0.866 | 0.934 | 1.000 | 0.974 | 0.995 | 0.965 | 0.931 | 0.949 | 0.934 | 0.955 | 0.968 | 0.927 | 0.980 | 0.866 | 1.000 | 0.974 | 0.995 | 0.974 | 0.931 | 0.949 | 0.955 | 0.968 | 0.927 | 0.957 | 0.985 | 0.995 | 0.981 |
| S14 | 0.976 | 0.974 | 0.974 | 0.968 | 0.961 | 0.974 | 0.929 | 0.893 | 0.966 | 0.929 | 0.841 | 0.927 | 0.974 | 1.000 | 0.984 | 0.974 | 0.968 | 0.967 | 0.927 | 0.929 | 0.955 | 0.893 | 0.966 | 0.841 | 0.974 | 1.000 | 0.984 | 1.000 | 0.968 | 0.967 | 0.929 | 0.955 | 0.893 | 0.974 | 0.961 | 0.984 | 0.986 |
| S15 | 0.960 | 0.963 | 0.966 | 0.947 | 0.977 | 0.954 | 0.954 | 0.974 | 0.973 | 0.954 | 0.841 | 0.946 | 0.995 | 0.984 | 1.000 | 0.966 | 0.947 | 0.950 | 0.946 | 0.954 | 0.967 | 0.874 | 0.973 | 0.841 | 0.995 | 0.984 | 1.000 | 0.984 | 0.947 | 0.950 | 0.954 | 0.967 | 0.874 | 0.954 | 0.982 | 1.000 | 0.986 |
| S16 | 0.989 | 0.985 | 1.000 | 0.979 | 0.971 | 0.985 | 0.941 | 0.962 | 0.972 | 0.941 | 0.899 | 0.927 | 0.965 | 0.974 | 0.966 | 1.000 | 0.979 | 0.994 | 0.927 | 0.941 | 0.961 | 0.862 | 0.972 | 0.899 | 0.965 | 0.974 | 0.966 | 0.974 | 0.979 | 0.994 | 0.941 | 0.961 | 0.862 | 0.985 | 0.981 | 0.966 | 0.984 |
| S17 | 0.974 | 0.980 | 0.979 | 1.000 | 0.939 | 0.967 | 0.908 | 0.920 | 0.935 | 0.908 | 0.845 | 0.924 | 0.931 | 0.968 | 0.947 | 0.979 | 1.000 | 0.984 | 0.924 | 0.908 | 0.929 | 0.920 | 0.935 | 0.845 | 0.931 | 0.968 | 0.947 | 0.968 | 1.000 | 0.984 | 0.908 | 0.929 | 0.920 | 0.967 | 0.951 | 0.947 | 0.969 |
| S18 | 0.990 | 0.989 | 0.994 | 0.984 | 0.964 | 0.988 | 0.928 | 0.942 | 0.965 | 0.928 | 0.903 | 0.916 | 0.949 | 0.967 | 0.950 | 0.994 | 0.984 | 1.000 | 0.916 | 0.928 | 0.950 | 0.942 | 0.965 | 0.903 | 0.949 | 0.967 | 0.950 | 0.967 | 0.984 | 1.000 | 0.928 | 0.950 | 0.942 | 0.988 | 0.968 | 0.950 | 0.977 |
| S19 | 0.930 | 0.950 | 0.927 | 0.924 | 0.953 | 0.907 | 0.985 | 0.903 | 0.951 | 0.985 | 0.909 | 1.000 | 0.934 | 0.927 | 0.946 | 0.927 | 0.924 | 0.916 | 1.000 | 0.985 | 0.979 | 0.903 | 0.951 | 0.909 | 0.934 | 0.927 | 0.946 | 0.927 | 0.924 | 0.916 | 0.985 | 0.979 | 0.903 | 0.907 | 0.951 | 0.946 | 0.966 |
| S20 | 0.944 | 0.955 | 0.941 | 0.908 | 0.974 | 0.925 | 1.000 | 0.930 | 0.978 | 1.000 | 0.860 | 0.985 | 0.955 | 0.929 | 0.954 | 0.941 | 0.908 | 0.928 | 0.985 | 1.000 | 0.995 | 0.930 | 0.978 | 0.860 | 0.955 | 0.929 | 0.954 | 0.929 | 0.908 | 0.928 | 1.000 | 0.995 | 0.930 | 0.925 | 0.967 | 0.954 | 0.972 |
| S21 | 0.966 | 0.971 | 0.961 | 0.929 | 0.983 | 0.954 | 0.995 | 0.927 | 0.991 | 0.995 | 0.870 | 0.979 | 0.968 | 0.955 | 0.967 | 0.961 | 0.929 | 0.950 | 0.979 | 0.995 | 1.000 | 0.927 | 0.991 | 0.870 | 0.968 | 0.955 | 0.967 | 0.955 | 0.929 | 0.950 | 0.995 | 1.000 | 0.927 | 0.954 | 0.973 | 0.967 | 0.985 |
| S22 | 0.954 | 0.896 | 0.962 | 0.920 | 0.905 | 0.957 | 0.930 | 1.000 | 0.984 | 0.930 | 0.947 | 0.903 | 0.927 | 0.893 | 0.874 | 0.862 | 0.920 | 0.942 | 0.903 | 0.930 | 0.927 | 1.000 | 0.884 | 0.947 | 0.927 | 0.893 | 0.874 | 0.893 | 0.920 | 0.942 | 0.930 | 0.927 | 1.000 | 0.957 | 0.886 | 0.874 | 0.877 |

|            |       |       |       |       |       |       |       |       |       |       |       |       |       |       |       |       |       |       |       |       |       |       |       |       |       |       |       |       |       |       |       |       |       |       |       |       |       |
|------------|-------|-------|-------|-------|-------|-------|-------|-------|-------|-------|-------|-------|-------|-------|-------|-------|-------|-------|-------|-------|-------|-------|-------|-------|-------|-------|-------|-------|-------|-------|-------|-------|-------|-------|-------|-------|-------|
| <b>S23</b> | 0.979 | 0.975 | 0.972 | 0.935 | 0.992 | 0.975 | 0.978 | 0.884 | 1.000 | 0.978 | 0.891 | 0.951 | 0.980 | 0.966 | 0.973 | 0.972 | 0.935 | 0.965 | 0.951 | 0.978 | 0.991 | 0.884 | 1.000 | 0.891 | 0.980 | 0.966 | 0.973 | 0.966 | 0.935 | 0.965 | 0.978 | 0.991 | 0.884 | 0.975 | 0.977 | 0.973 | 0.986 |
| <b>S24</b> | 0.886 | 0.879 | 0.899 | 0.845 | 0.892 | 0.891 | 0.860 | 0.947 | 0.891 | 0.860 | 1.000 | 0.809 | 0.866 | 0.841 | 0.841 | 0.899 | 0.845 | 0.903 | 0.909 | 0.860 | 0.870 | 0.947 | 0.891 | 1.000 | 0.866 | 0.841 | 0.841 | 0.841 | 0.845 | 0.903 | 0.860 | 0.870 | 0.947 | 0.891 | 0.888 | 0.841 | 0.885 |
| <b>S25</b> | 0.961 | 0.960 | 0.965 | 0.931 | 0.984 | 0.957 | 0.955 | 0.927 | 0.980 | 0.955 | 0.866 | 0.934 | 1.000 | 0.974 | 0.995 | 0.965 | 0.931 | 0.949 | 0.934 | 0.955 | 0.968 | 0.927 | 0.980 | 0.866 | 1.000 | 0.974 | 0.995 | 0.974 | 0.931 | 0.949 | 0.955 | 0.968 | 0.927 | 0.957 | 0.985 | 0.995 | 0.981 |
| <b>S26</b> | 0.976 | 0.974 | 0.974 | 0.968 | 0.961 | 0.974 | 0.929 | 0.893 | 0.966 | 0.929 | 0.841 | 0.927 | 0.974 | 1.000 | 0.984 | 0.974 | 0.968 | 0.967 | 0.927 | 0.929 | 0.955 | 0.893 | 0.966 | 0.841 | 0.974 | 1.000 | 0.984 | 1.000 | 0.968 | 0.967 | 0.929 | 0.955 | 0.893 | 0.974 | 0.961 | 0.984 | 0.986 |
| <b>S27</b> | 0.960 | 0.963 | 0.966 | 0.947 | 0.977 | 0.954 | 0.954 | 0.974 | 0.973 | 0.954 | 0.841 | 0.946 | 0.995 | 0.984 | 1.000 | 0.966 | 0.947 | 0.950 | 0.946 | 0.954 | 0.967 | 0.874 | 0.973 | 0.841 | 0.995 | 0.984 | 1.000 | 0.984 | 0.947 | 0.950 | 0.954 | 0.967 | 0.874 | 0.954 | 0.982 | 1.000 | 0.986 |
| <b>S28</b> | 0.976 | 0.974 | 0.974 | 0.968 | 0.961 | 0.974 | 0.929 | 0.893 | 0.966 | 0.929 | 0.841 | 0.927 | 0.974 | 1.000 | 0.984 | 0.974 | 0.968 | 0.967 | 0.927 | 0.929 | 0.955 | 0.893 | 0.966 | 0.841 | 0.974 | 1.000 | 0.984 | 1.000 | 0.968 | 0.967 | 0.929 | 0.955 | 0.893 | 0.974 | 0.961 | 0.984 | 0.986 |
| <b>S29</b> | 0.974 | 0.980 | 0.979 | 1.000 | 0.939 | 0.967 | 0.908 | 0.920 | 0.935 | 0.908 | 0.845 | 0.924 | 0.931 | 0.968 | 0.947 | 0.979 | 1.000 | 0.984 | 0.924 | 0.908 | 0.929 | 0.920 | 0.935 | 0.845 | 0.931 | 0.968 | 0.947 | 0.968 | 1.000 | 0.984 | 0.908 | 0.929 | 0.920 | 0.967 | 0.951 | 0.947 | 0.969 |
| <b>S30</b> | 0.990 | 0.989 | 0.994 | 0.984 | 0.964 | 0.988 | 0.928 | 0.942 | 0.965 | 0.928 | 0.903 | 0.916 | 0.949 | 0.967 | 0.950 | 0.994 | 0.984 | 1.000 | 0.916 | 0.928 | 0.950 | 0.942 | 0.965 | 0.903 | 0.949 | 0.967 | 0.950 | 0.967 | 0.984 | 1.000 | 0.928 | 0.950 | 0.942 | 0.988 | 0.968 | 0.950 | 0.977 |
| <b>S31</b> | 0.944 | 0.955 | 0.941 | 0.908 | 0.974 | 0.925 | 1.000 | 0.930 | 0.978 | 1.000 | 0.860 | 0.985 | 0.955 | 0.929 | 0.954 | 0.941 | 0.908 | 0.928 | 0.985 | 1.000 | 0.995 | 0.930 | 0.978 | 0.860 | 0.955 | 0.929 | 0.954 | 0.929 | 0.908 | 0.928 | 1.000 | 0.995 | 0.930 | 0.925 | 0.967 | 0.954 | 0.972 |
| <b>S32</b> | 0.966 | 0.971 | 0.961 | 0.929 | 0.983 | 0.954 | 0.995 | 0.927 | 0.991 | 0.995 | 0.870 | 0.979 | 0.968 | 0.955 | 0.967 | 0.961 | 0.929 | 0.950 | 0.979 | 0.995 | 1.000 | 0.927 | 0.991 | 0.870 | 0.968 | 0.955 | 0.967 | 0.955 | 0.929 | 0.950 | 0.995 | 1.000 | 0.927 | 0.954 | 0.973 | 0.967 | 0.985 |
| <b>S33</b> | 0.954 | 0.896 | 0.962 | 0.920 | 0.905 | 0.957 | 0.930 | 1.000 | 0.984 | 0.930 | 0.947 | 0.903 | 0.927 | 0.893 | 0.874 | 0.862 | 0.920 | 0.942 | 0.903 | 0.930 | 0.927 | 1.000 | 0.884 | 0.947 | 0.927 | 0.893 | 0.874 | 0.893 | 0.920 | 0.942 | 0.930 | 0.927 | 1.000 | 0.957 | 0.886 | 0.874 | 0.877 |
| <b>S34</b> | 0.986 | 0.979 | 0.985 | 0.967 | 0.971 | 1.000 | 0.925 | 0.957 | 0.975 | 0.925 | 0.891 | 0.907 | 0.957 | 0.974 | 0.954 | 0.985 | 0.967 | 0.988 | 0.907 | 0.925 | 0.954 | 0.957 | 0.975 | 0.891 | 0.957 | 0.974 | 0.954 | 0.974 | 0.967 | 0.988 | 0.925 | 0.954 | 0.957 | 1.000 | 0.956 | 0.954 | 0.976 |
| <b>S35</b> | 0.971 | 0.974 | 0.981 | 0.951 | 0.985 | 0.956 | 0.967 | 0.886 | 0.977 | 0.967 | 0.888 | 0.951 | 0.985 | 0.961 | 0.982 | 0.981 | 0.951 | 0.968 | 0.951 | 0.967 | 0.973 | 0.886 | 0.977 | 0.888 | 0.985 | 0.961 | 0.982 | 0.961 | 0.951 | 0.968 | 0.967 | 0.973 | 0.886 | 0.956 | 1.000 | 0.982 | 0.984 |
| <b>S36</b> | 0.960 | 0.963 | 0.966 | 0.947 | 0.977 | 0.954 | 0.954 | 0.974 | 0.973 | 0.954 | 0.841 | 0.946 | 0.995 | 0.984 | 1.000 | 0.966 | 0.947 | 0.950 | 0.946 | 0.954 | 0.967 | 0.874 | 0.973 | 0.841 | 0.995 | 0.984 | 1.000 | 0.984 | 0.947 | 0.950 | 0.954 | 0.967 | 0.874 | 0.954 | 0.982 | 1.000 | 0.986 |
| <b>RFP</b> | 0.981 | 0.987 | 0.984 | 0.969 | 0.986 | 0.976 | 0.972 | 0.977 | 0.986 | 0.972 | 0.885 | 0.966 | 0.981 | 0.986 | 0.986 | 0.984 | 0.969 | 0.977 | 0.966 | 0.972 | 0.985 | 0.877 | 0.986 | 0.885 | 0.981 | 0.986 | 0.986 | 0.986 | 0.969 | 0.977 | 0.972 | 0.985 | 0.877 | 0.976 | 0.984 | 0.986 | 1.000 |
